# Supplementary material for: When is birthweight at term (≥37 weeks' gestation) abnormally low? A systematic review and meta-analysis of the prognostic and predictive ability of current birthweight standards for childhood and adult outcomes
Source: PubMed Central journal article supplement — BJOG. 2015 Jan 20;122(5):634–42. doi: 10.1111/1471-0528.13282 (PMC4413055; doi:10.1111/1471-0528.13282), 2015-01-20
Supplement: bjo0122-0634-sd2.pdf [file bjo0122-0634-sd2.pdf]

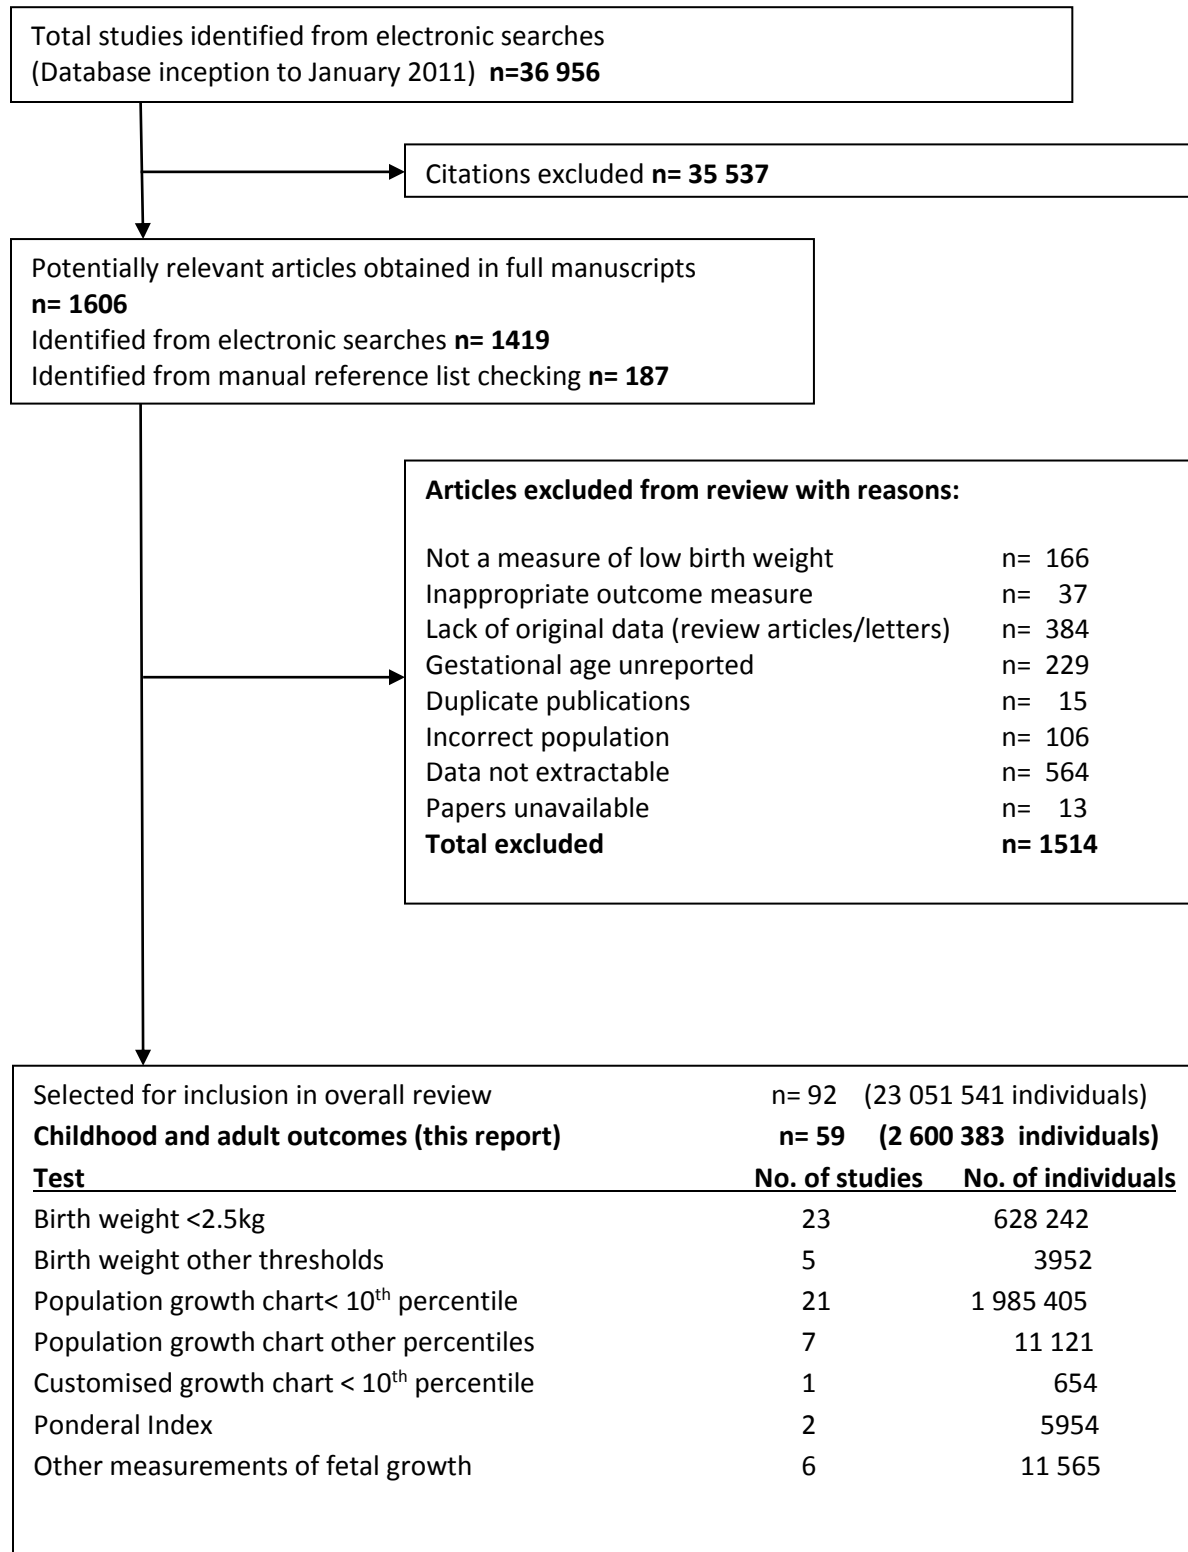

**Figure S1.** Study selection process for systematic review of the prognostic and predictive ability of current birth weight standards for short and long term outcomes
